1 **Simultaneously vocalizing Asian barbets adopt different frequencies without**  
2 **coordinating temporal rhythms**

3 Anand Krishnan<sup>1</sup>

4

5 1- Indian Institute of Science Education and Research (IISER) Pune, Pashan Road, Pune  
6 411008, India. Email: [anandk@iiserpune.ac.in](mailto:anandk@iiserpune.ac.in)

7 **Running title:** Vocal rhythms of Asian barbets

8 **Keywords:** Barbet, duet, frequency, sound stream segregation, vocal coordination

9

10 **Abstract**

11 Sound stream segregation is an important challenge faced by simultaneously vocalizing  
12 animals. In duetting passerine birds, coordinating vocal timing helps minimize overlap.  
13 Alternatively, in birds that do not coordinate their vocalizations, sound stream segregation may  
14 involve other mechanisms. For example, birds are known to use frequency differences to  
15 segregate sound streams, and vocalizing at different frequencies may enable them to remain  
16 distinct from each other. Here, I present data showing that conspecific individuals of four  
17 species of Asian barbets vocalize at distinctly different peak frequencies from each other.  
18 Additionally, they also differ in repetition rate such that each species exhibits two peaks in  
19 frequency-repetition rate space. However, conspecific individuals across species do not  
20 temporally coordinate with each other during vocal interactions, maintaining independent and  
21 highly stereotyped individual rhythms together with different peak frequencies. Frequency  
22 differences between individuals may facilitate sound stream segregation when calls overlap in  
23 time. I hypothesize that simple, uncoordinated temporal rhythms with different frequencies may  
24 have given rise to the more complex coordination seen in duetting birds.

25

26

## 27 **Introduction**

28 Animal choruses represent a striking natural example of the ‘cocktail party problem’, where  
29 individuals must segregate relevant information from competing streams of sound[1,2].  
30 Vocalizing at differing frequencies[3], or altering vocal timing[4,5] may minimize masking  
31 interference from overlapping sounds. Many bird species sing complex duets, which serve to  
32 communicate or cooperatively defend territories[6,7]. Duetting pairs coordinate vocal timing,  
33 resulting in a definite phase relationship between simultaneously vocalizing birds[8,9]. Other  
34 ‘duetters’ simply sing together without coordination, and their vocalizations drift in and out of  
35 phase with each other[6,10]. As a result, simultaneously vocalizing conspecifics may overlap in  
36 time. The mechanisms employed by these birds to remain distinct are relatively poorly  
37 understood.

38 Here, I study the vocal strategies of four species of Asian barbet (Piciformes: Megalaimidae)[11]  
39 in two regions of India. Each region possesses two species with different vocal frequencies from  
40 each other[12]. I examined whether simultaneously vocalizing conspecific barbets also exhibited  
41 frequency differences, as well as whether they coordinate vocal timing to minimize temporal  
42 overlap. Understanding the vocal strategies employed by these non-passerine birds has  
43 implications in understanding the evolution of coordinated signals such as pair-displays.

44

## 45 **Materials and Methods**

### 46 *Recording*

47 I passively recorded barbet choruses in the city of Pune in Maharashtra (Peninsular India), and  
48 the village of Mandal in Uttarakhand (Western Himalayas) in March-April 2018, early in the  
49 breeding season. Each site houses two species of barbet, *Psilopogon viridis*/*P. haemacephalus*  
50 in Pune, and *P. virens*/*P. asiaticus* in Mandal (Figure 1A), all easily observed close to human  
51 habitation. For recordings, I used Sennheiser (Wedemark, Germany) ME62 omnidirectional  
52 microphones connected to a Zoom H6 (Tokyo, Japan) recorder sampling at 44.1KHz, making

53 note of multiple simultaneously vocalizing conspecific individuals. The recorder and  
54 microphones were stationary on the ground to avoid movement noise. The overall dataset  
55 consisted of approximately seven hours of barbet chorus recordings.

56

### 57 *Analysis*

58 Using Raven Pro 1.5 (Cornell Laboratory of Ornithology, Ithaca, NY, USA), I digitized  
59 vocalizations of barbets from each recording (Hann window size 512 samples with overlap of  
60 256 samples) and calculated peak frequencies (PF) as well as the inter-phrase interval (IPI, the  
61 time gap between the end of one phrase and the beginning of the next). For each species, I  
62 digitized approximately 2500 individual phrases (1-5 notes/phrase depending on the species). I  
63 listened to all recordings using headphones while labeling vocalizations, differentiating  
64 conspecific individuals by the differences in relative amplitude (birds that were further from the  
65 microphone were softer in recordings, and distinguishable in Raven). I measured the  
66 interquartile range or IQR of IPI (for 108 total instances of a vocal barbet), to quantify  
67 stereotypy. Secondly, to examine whether simultaneously vocalizing conspecifics (36 instances)  
68 were temporally synchronous or asynchronous with each other, I calculated the time lag  
69 between the beginning of each phrase of one individual and the closest call of the other using  
70 MATLAB (Mathworks Inc., Natick, MA, USA). If birds were synchronous, I predicted that the  
71 distribution of time lags across a bout should show a clear peak and low coefficient of variation  
72 (i.e. a stereotypical time lag between individuals)[13]. However, an asynchronous bout would  
73 imply independent rhythms from each other; the two individuals would thus drift in and out of  
74 phase, resulting in a uniform distribution of time lags. For each instance with 5 or more  
75 measured time lags (27/36), I performed two-sample Kolmogorov-Smirnov tests against 100  
76 randomly generated uniform distributions spanning the same range of values. I scored the  
77 results as 0 if they did not differ significantly from uniform ( $P > 0.05$ ), or 1 if they did ( $P < 0.05$ ), and  
78 measured the percentage of total 1's (out of 100 tests) for each of the 27 instances. A score of 0

79 indicated a uniform distribution of time lags consistent with independent temporal rhythms, and  
80 a score of 1 indicated a constant time lag consistent with two birds singing in coordination.

81

## 82 **Results**

### 83 *Conspecific barbets sing at different frequencies and repetition rates*

84 PF-IPI probability density plots reveal bimodal distributions for each species, indicating  
85 intraspecific variation in PF and IPI (Figure 1B, see supplementary videos for 3D rotations). This  
86 is most pronounced in *P. haemacephalus*, suggesting two distinct types of song, a faster song  
87 at 0.7KHz, and a slower song at about 0.95KHz. Both *P. viridis* and *P. virens* exhibit two peaks in  
88 PF-IPI space, also indicating faster and slower songs. *P. asiaticus* also exhibits a bimodal  
89 probability density distribution, but the two peaks in my dataset indicate smaller differences in  
90 IPI than the other species.

91

### 92 *Simultaneously vocalizing conspecifics sing at independent rhythms without synchronization*

93 Across 36 instances of simultaneously vocalizing conspecifics (pooled data from all 4 species), I  
94 consistently observed differences in frequency and repetition rate between conspecific  
95 individuals (spectrograms in Figure 2A). A probability density plot of the differences between  
96 two individuals exhibited a non-zero peak in both PF and IPI (Supplementary Figure 1A).  
97 Conspecifics thus vocalize at different frequencies and repetition rates from each other.  
98 I next sought to establish whether vocally interacting conspecific barbets adjusted their  
99 repetition rates to maintain synchrony with their vocal neighbors. The time lags between the  
100 calls of two individuals have very high coefficients of variation for each species  
101 (*P. haemacephalus*: 144.13%, *P. viridis*: 164.52%, *P. virens*: 182.55%, *P. asiaticus*: 197.11%),  
102 supporting a lack of vocal timing coordination[6]. Time lags exhibit a range of values across all 4  
103 species, as opposed to a single value that would be expected if two individuals coordinated  
104 vocal timing by phase-locking (Figure 2B). When compared to 100 randomized uniform

105 distributions (27 instances, see Methods), time lags fit a uniform distribution 92% of the time on  
106 average (average score 0.08,  $P > 0.05$ , Supplementary Data, Supplementary Figure 1B, also see  
107 Methods). This uniform distribution of time lags, together with high CVs, thus supports barbets  
108 vocalizing with independent temporal rhythms rather than synchronizing with each other.  
109 Further, each barbet maintains its individual rhythm even when vocalizing with conspecifics. The  
110 probability density plot of IQRs for the IPI of each individual barbet peaked at 47ms  
111 (Supplementary Figure 1C), indicating  $< 50$ ms jitter in vocal timing across all species (including  
112 measurement-related variation). This analysis included every individual instance of a vocal  
113 barbet across the dataset (solo and with other conspecifics), in spite of which I still observed a  
114 sharp peak indicating a precise vocal rhythm. This further supports the idea that barbets  
115 maintain stable, independent vocal rhythms regardless of whether they vocalize solo or with  
116 conspecifics.

117

## 118 **Discussion**

119 Avian duets and other vocal interactions have received much study for the precisely coordinated  
120 vocal timing between individuals[6,9]. However, some 'duetters' exhibit independent rhythms  
121 with no phase-locking or coordination between simultaneously vocalizing individuals[6]. My data  
122 suggests that Asian barbets fall into this latter category, and I also find that simultaneously  
123 vocalizing individuals tend to differ in the peak frequencies of their vocalizations. If two barbets  
124 vocalize at independent and different rhythms, their calls will drift in and out of phase with each  
125 other (resulting in a uniform distribution of time lags between the two individuals, as opposed to  
126 the single peak one might expect if they were coordinated with each other). It is noteworthy that  
127 two of the species I studied (*P.haemacephalus* and *P.virens*) have been described in the  
128 literature as duetters[6]. However, all four species studied here exhibit similar patterns of  
129 frequency and repetition rate differences between individuals, without timing coordination. This  
130 indicates that all Asian barbets may vocalize with independent, uncoordinated rhythms.

131 Dilger[14] described ‘duetting’ in *P.haemacephalus* involving members of a pair singing at  
132 different frequencies. Across species, I find that some individuals sing together with large PF  
133 and IPI differences, and others with relatively small PF and IPI differences. However, none of  
134 these cases exhibit evidence of a ‘call-answer’ type of vocal coordination as seen in duetting  
135 passerine birds. Instead, barbets appear to simply adopt different temporal rhythms from each  
136 other, which may involve paying attention only to the start of another bird’s bout. Although  
137 different repetition rates may reduce temporal overlap to some extent, some vocalizations of two  
138 individuals will still overlap in time. In this case, frequency differences between individuals may  
139 support sound stream segregation[3,15]. Sympatric heterospecific barbets occupy distinct  
140 frequency bands[12], and my data therefore suggests that smaller frequency differences may  
141 also enable segregation of conspecifics within each species’ band.

142 Some species of the related African barbets (Lybiidae:*Trachyphonus*) appear to exhibit  
143 coordination between duetting individuals[8,16], although other species may exhibit independent  
144 rhythms[10]. It is possible that barbets may sometimes coordinate their rhythms over short time  
145 scales, although my study does not find evidence of this. The similarly non-passerine pheasant-  
146 coucal also exhibits pair-singing, with each partner vocalizing at a different frequency[17].  
147 Passerine birds may have evolved temporally coordinated duets multiple times[6,13,18], and it  
148 is possible that these may have arisen from uncoordinated simultaneous singing such as that  
149 seen in non-passerines. Comparative study of vocal strategies may help understand the  
150 ancestry of complex, temporally coordinated duets.

151

## 152 **Acknowledgments**

153 I thank Rohit Chakravarty, Zareef Khan, Baseer Baniya and Arun Varghese for assistance  
154 during recordings, Raghav Rajan and his lab for inputs on the data, Samira Agnihotri and  
155 Shivam Chitnis for discussions on analysis.

156

157 **Funding**

158 My research is funded by an INSPIRE Faculty Award from the Department of Science and  
159 Technology, Government of India and an Early Career Research (ECR/2017/001527) Grant  
160 from the Science and Engineering Research Board (SERB), Government of India.

161

162 **References**

- 163 1. Bee, M. A. & Micheyl, C. 2008 The 'Cocktail Party Problem': What is it? How can it be  
164 solved? And why should animal behaviorists study it? *J. Comp. Psychol* **122**, 235–251.
- 165 2. Greenfield, M. D. 1994 Synchronous and alternating choruses in insects and anurans:  
166 Common mechanisms and diverse functions. *Integr. Comp. Biol.* **34**, 605–615.  
167 (doi:10.1093/icb/34.6.605)
- 168 3. Nityananda, V. & Bee, M. A. 2011 Finding your mate at a cocktail party: Frequency  
169 separation promotes auditory stream segregation of concurrent voices in multi-species  
170 frog choruses. *PLoS One* **6**.
- 171 4. Fleischer, R. C., Boarman, W. I. & Cody, M. L. 1985 Asynchrony of song series in the  
172 Bewick's wren and wren tit. *Anim. Behav.* **33**, 674–676. (doi:10.1016/S0003-  
173 3472(85)80095-6)
- 174 5. Brumm, H. 2006 Signalling through acoustic windows: Nightingales avoid interspecific  
175 competition by short-term adjustment of song timing. *J. Comp. Physiol. A Neuroethol.*  
176 *Sensory, Neural, Behav. Physiol.* **192**, 1279–1285. (doi:10.1007/s00359-006-0158-x)
- 177 6. Hall, M. L. 2009 Chapter 3 A Review of Vocal Duetting in Birds. *Adv. Study Behav.* **40**,  
178 67–121. (doi:10.1016/S0065-3454(09)40003-2)
- 179 7. Hall, M. L. 2004 A review of hypotheses for the functions of avian duetting. *Behav. Ecol.*  
180 *Sociobiol.* **55**, 415–430. (doi:10.1007/s00265-003-0741-x)
- 181 8. Thorpe, W. H. 1963 Antiphonal singing in birds as evidence for avian auditory reaction  
182 time. *Nature* **197**, 774–776. (doi:10.1038/197774a0)

- 183 9. Fortune, E. S., Rodríguez, C., Li, D., Ball, G. F. & Coleman, M. J. 2011 Neural  
184 mechanisms for the coordination of duet singing in wrens. *Science* (80-. ). **334**, 666–670.  
185 (doi:10.1126/science.1209867)
- 186 10. Payne, R. B. & Skinner, N. J. 1970 Temporal patterns of duetting in african barbets. *Ibis*  
187 (*Lond. 1859*). **112**, 173–183. (doi:10.1111/j.1474-919X.1970.tb00091.x)
- 188 11. Short, L. . & Horne, J. F. M. 2001 *Toucans, Barbets and Honeyguides*. Oxford Univ.  
189 Press.
- 190 12. Krishnan, A. & Tamma, K. 2016 Divergent morphological and acoustic traits in sympatric  
191 communities of Asian barbets. *R. Soc. Open Sci.* **3**, 160117. (doi:10.1098/rsos.160117)
- 192 13. Taylor, C. J., Hall, M. L., Cain, K. E. & Langmore, N. E. 2019 A superb solo, or a deviant  
193 duet? Overlapping songs in superb fairy-wrens. *Behav. Ecol.* **30**, 1076–1086.  
194 (doi:10.1093/beheco/arz052)
- 195 14. Dilger, W. C. 1953 Duetting in the Crimson-breasted barbet. *Condor* **55**, 220–221.
- 196 15. MacDougall-Shackleton, S. A., Hulse, S. H., Gentner, T. Q. & White, W. 1998 Auditory  
197 scene analysis by European starlings (*Sturnus vulgaris*): perceptual segregation of tone  
198 sequences. *J. Acoust. Soc. Am.* **103**, 3581–3587.
- 199 16. Horne, J. F. M. & Short, L. L. 1983 A Review of Duetting, Sociality and Speciation in  
200 Some African Barbets (*Capitonidae*). *Condor* **85**, 323–332. (doi:10.2307/1367069)
- 201 17. Maurer, G., Smith, C., Süsser, M. & Magrath, R. D. 2008 Solo and duet calling in the  
202 pheasant coucal: sex and individual call differences in a nesting cuckoo with reversed  
203 size dimorphism. *Aust. J. Zool.* **56**, 143–149.
- 204 18. Logue, D. M. & Hall, M. L. 2014 Migration and the evolution of duetting in songbirds.  
205 *Proc. R. Soc. B Biol. Sci.* **281**. (doi:10.1098/rspb.2014.0103)
- 206  
207  
208



209 **Figure legends**

210 **Figure 1: A.** Spectrograms of barbet vocalizations from Peninsular India (left) and the Western  
211 Himalayas (right). **B.** Three-dimensional probability density distributions indicating the  
212 occurrence of different PF and repetition rates (IPI) for each species. For each instance of a  
213 vocalizing barbet in the dataset, these plots contain the mean plus and minus one SD for PF,  
214 and median, upper and lower quartile values for IPI, to represent the overall variation (both  
215 inter- and intra-individual) in frequency-time space. This last is for illustrative purposes only, and  
216 the quartiles have otherwise only been used to calculate the IQR for the IPI of each species.

217

218 **Figure 2: A.** Spectrograms of two simultaneously vocalizing *P.viridis* (left) and  
219 *P.haemacephalus* (right), demonstrating intraspecific differences in frequency and repetition  
220 rate. The white bars represent the time lag between two individuals; note how it changes with  
221 each repetition. **B.** Graphs of all measured values of time lag between two individuals for each  
222 species of barbet. The longer the horizontal bar, the longer the time lag; the y-axis represents  
223 the number of such measurements made per species. Values vary from approximately 100ms  
224 to over a second, indicating a lack of temporal synchrony between individuals.

225

226 **Supplementary Figure 1: A.** 3D probability density distribution for inter-individual differences in  
227 PF and IPI. The peak suggests that most simultaneously vocalizing individuals have about a  
228 100Hz difference in PF and a 300-500ms difference in IPI. **B.** Proportion of 100 Kolmogorov-  
229 Smirnov tests in which the observed distribution of time lags differed from a random uniform  
230 distribution (for 27 instances of two conspecific barbets vocalizing together). In 18/27 cases, the  
231 observed distribution fit >90% to a uniform distribution (x-axis values <0.1, indicating  
232 independent temporal rhythms without synchrony). Almost all other instances also fit well to a  
233 uniform distribution (the lowest being a 59% fit to uniform, x-axis value 0.41), again supporting  
234 independent vocal rhythms. **C.** Distribution of IQRs for the IPI of each individual instance of a

235 vocalizing barbet across the entire dataset (both solo and simultaneous calling, N=108). The  
236 peak at 47ms indicates very low IQRs, and therefore a highly stereotyped temporal rhythm  
237 regardless of whether the barbet is vocalizing solo or with conspecifics.  
238

A

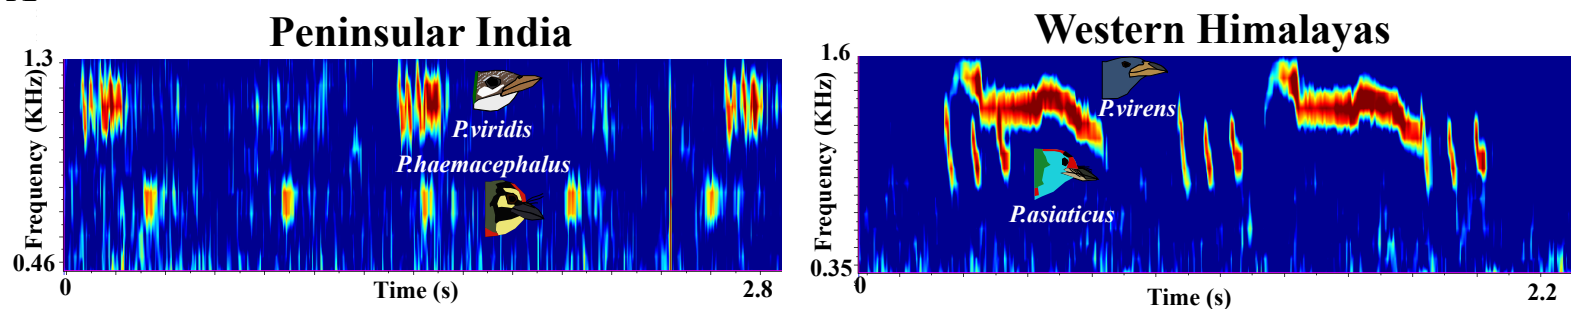

B

**Peninsular India**

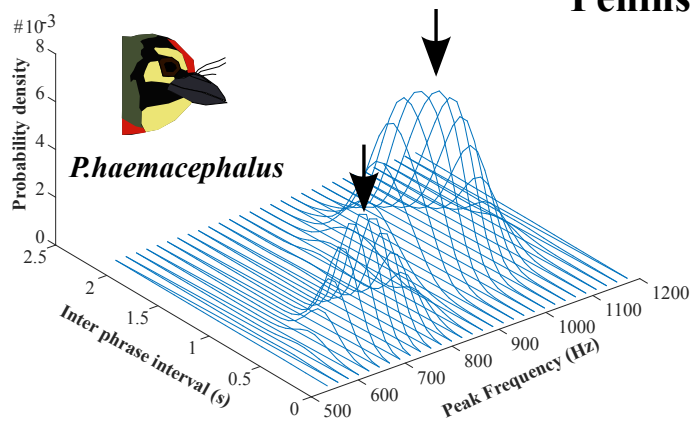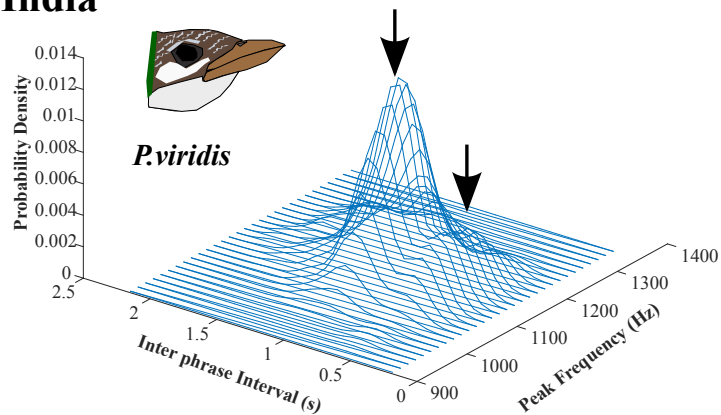

**Western Himalayas**

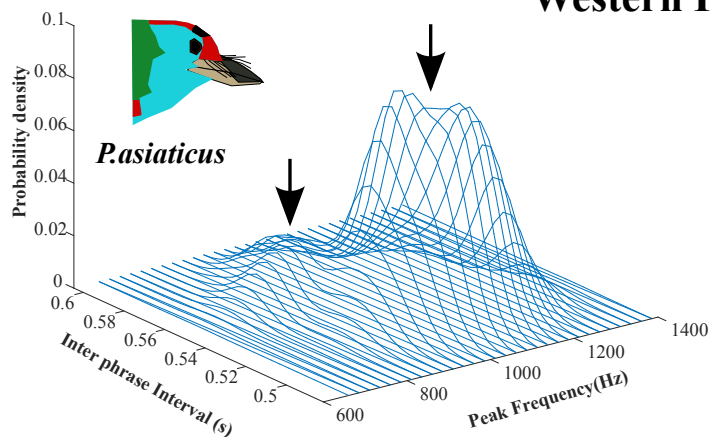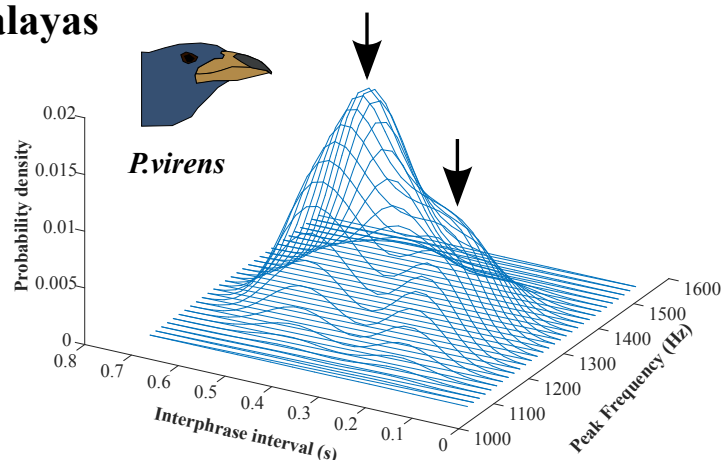

**A**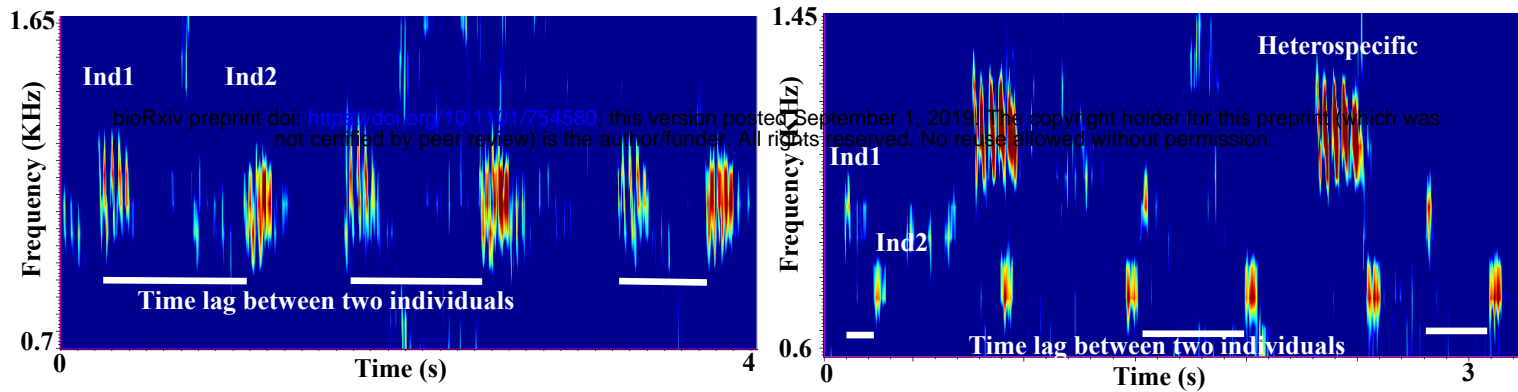**B**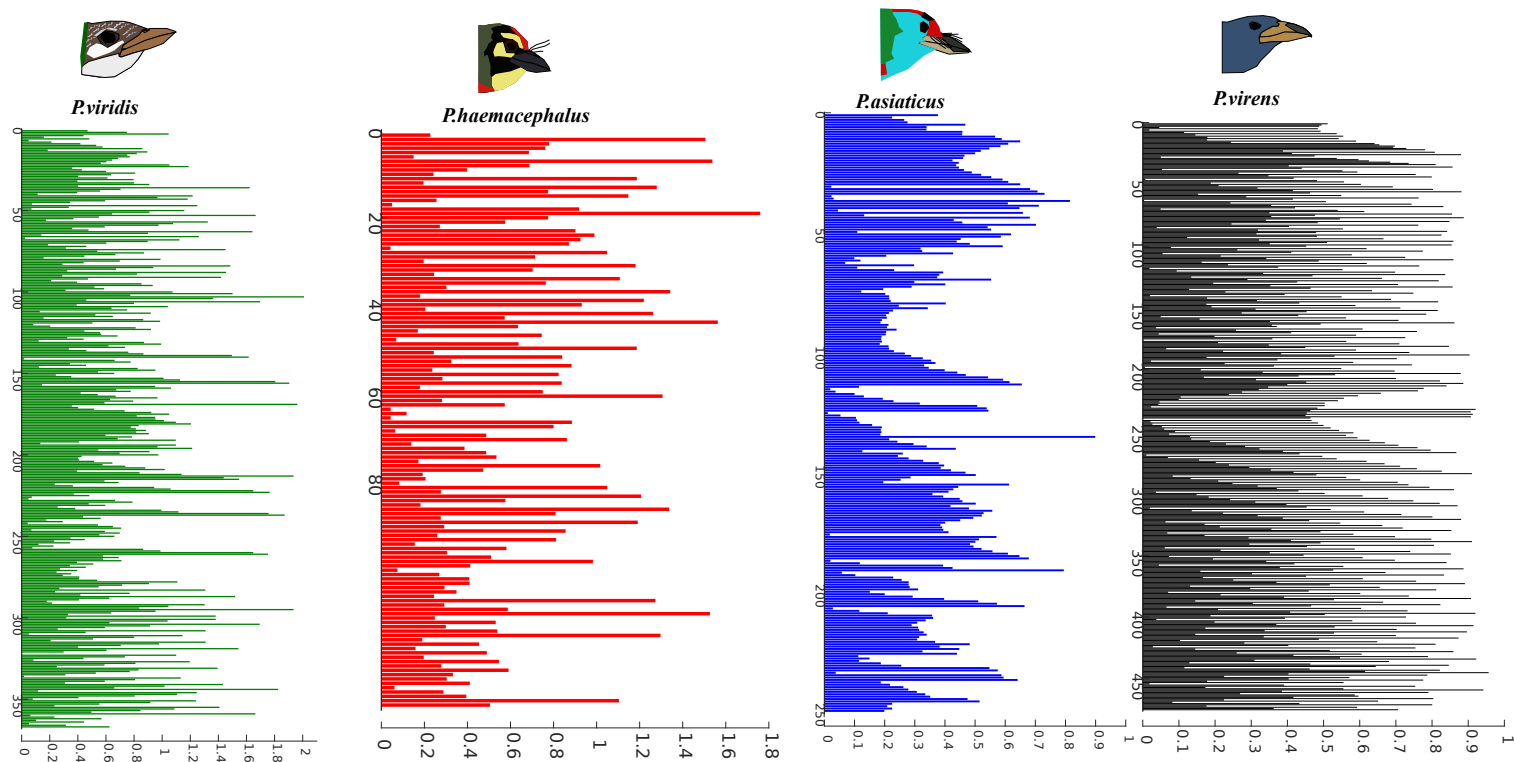

**Time lag between simultaneously  
vocalizing individuals (s)**
