# Supplementary material for: Simultaneously vocalizing Asian barbets adopt different frequencies without coordinating temporal rhythms
Source: bioRxiv or medRxiv preprint supplement (doi:10.1101/754580), 2020-02-27

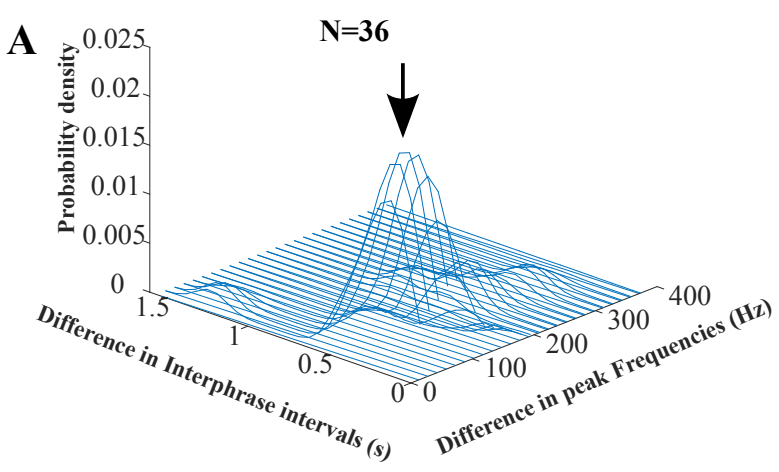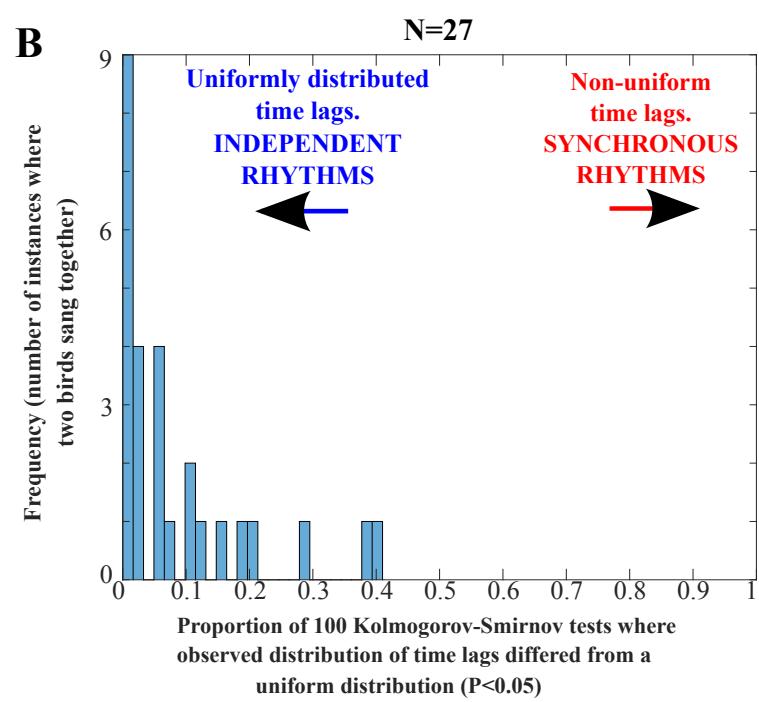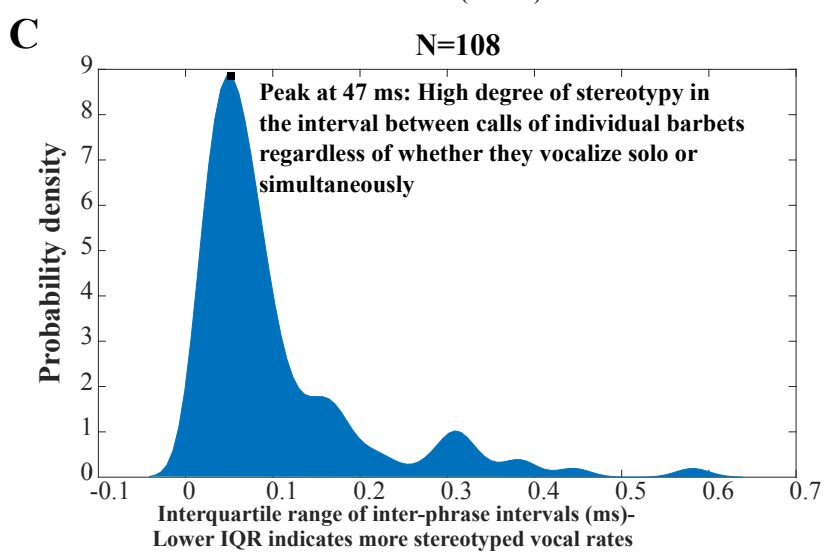

Supplement: Supplementary file [file media-1.pdf]
